# Supplementary material
Source: publisher figshare collection journal article supplement (https://acs.figshare.com/ndownloader/files/31083956)
Supplement: Supplementary file 1 [file 31083956]

# Supporting Information

*In situ* synthesized rod-like MoS<sub>2</sub> as cocatalyst enhanced photocatalytic hydrogen evolution of graphitic carbon nitride (g-CN) without noble metal

*Junzhuo Li*<sup>a</sup>, *Wanbao Wu*<sup>b</sup>, *Yudong Li*<sup>c</sup>, *Haixin Zhang*<sup>a</sup>, *Xianzhu Xu*<sup>a</sup>, *Yanqiu Jiang*<sup>\*,a</sup>, *Kaifeng Lin*<sup>\*,a</sup>

- a. MIIT Key Laboratory of Critical Materials Technology for New Energy Conversion and Storage, School of Chemistry and Chemical Engineering, Harbin Institute of Technology, 92 West Dazhi Street, Nan Gang District, Harbin 150001, People's Republic of China.
- b. School of Materials Science and Engineering, Harbin Institute of Technology (Shenzhen) Shenzhen 518055, China
- c. Key Laboratory of Bio-based Material Science & Technology, Ministry of Education, Northeast Forestry University, Harbin 150040, People's Republic of China.

\*Yanqiu Jiang: [jiangyanqiu@hit.edu.cn](mailto:jiangyanqiu@hit.edu.cn)

\* Kaifeng Lin: [linkaifeng@hit.edu.cn](mailto:linkaifeng@hit.edu.cn)

## Material Characterizations

X-ray diffraction (XRD) patterns were measured with a Panalytical X'Pert PRO X-ray diffractometer with a Cu K $\alpha$  radiation ( $\lambda = 1.5418 \text{ \AA}$ ) as X-Ray source. The Fourier Transform infrared (FT-IR) absorption spectra of the samples was measured and recorded on a Perkin Elmer 100 spectrometer. The pictures of the micro-morphology were recorded by a field emission scanning electron microscope (SEM), ZEISS SUPRA55 FEGSEM and a transmission electron microscope (TEM), HITACHI JEM-2100, respectively. The X-ray photoelectron spectra (XPS) data of the sample were obtained using a PHI 5700 ESCA spectrometer working with an Al K $\alpha$  radiation as the excitation source ( $h\nu = 1486.6 \text{ eV}$ ) and the C 1s line was used as the calibration. The UV-Vis diffuse reflectance spectra (DRS) from 200 nm to 800 nm was recorded by a Perkin Elmer Lambda 750 spectrophotometer. The nitrogen adsorption-desorption isotherms and pore size distribution were recorded at 77 K with a Micromeritics ASAP2020.

## Photocatalytic Activity Measurement

The photocatalytic activity was evaluated by splitting water to evolve hydrogen under visible light. Triethanolamine (TEOA) solution (10 vol%) was chosen as the sacrificial agent. The experiment was undergoing without co-catalyst. 0.1 g of as-prepared samples was added in 300 mL aqueous solution in a quartz reactor with TEOA under stirring. After fully dispersed by sonicating for 10 min, the solution was degassed under Nitrogen flowing. A 300W Xe Lamp working with a 420 nm cut off filter was used as the light source and the device was cooled with cold water circulation during the reaction. The evolved gas was measured by a gas chromatography equipped with a TCD detector.

## Photo-electrochemical Measurement

The photo-electrochemical property of the samples was investigated on a CHI 660D electrochemical workstation with a three-electrode system and Na<sub>2</sub>SO<sub>4</sub> (0.5 mol L<sup>-1</sup>) solution was used as electrolyte. In this system, Ag/AgCl electrode (saturated KCl solution), Pt wire electrode and glassy carbon electrode with the ink of the samples were used as reference electrode, counter-electrode and working electrode, respectively. Appropriate amount of sample (0.2 mg·cm<sup>-2</sup>) was fully dispersed in the solution of water, 5 wt% Nafion and alcohol under ultrasonic, and the mixture was dropped on the active area of working electrode (0.19625 cm<sup>2</sup>). A 300W Xe lamp (HSX-F/UV300, Beijing NBeT) was used as the light source and the transient photocurrent responses analysis was measured in on-off cycles of visible light irradiation and the electrochemical impedance spectroscopy was measured without light irradiation.

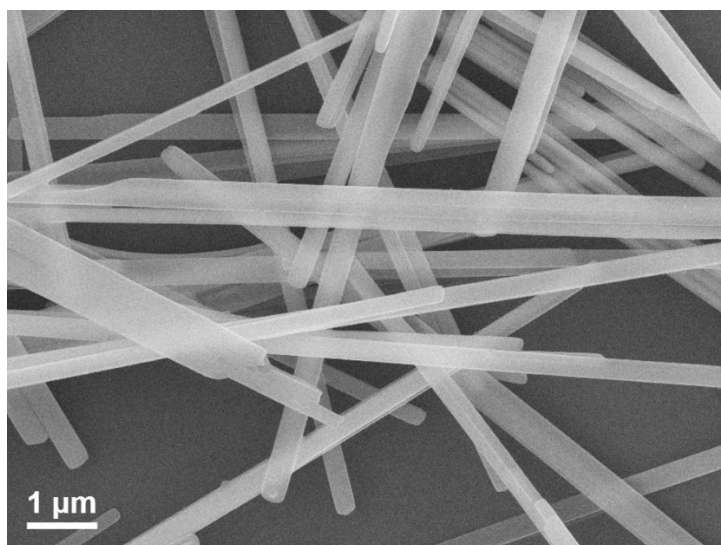

**Figure S1.** The morphology of rod-like MoO<sub>3</sub> by SEM

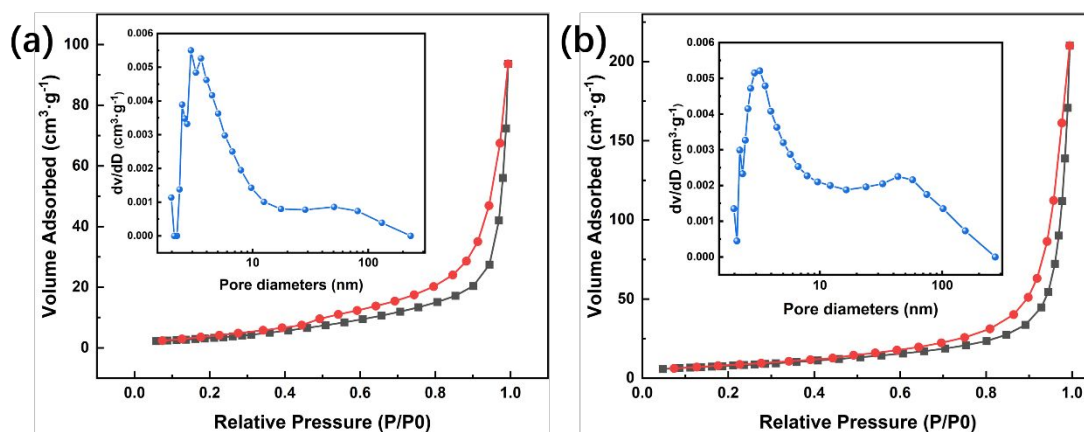

**Figure S2** N<sub>2</sub> adsorption-desorption isotherms and corresponding Barret-Joyer-Halenda (BJH) pore-size distribution curves (inset) of the sample. a g-CN and b g-CN/MoS<sub>2</sub>-0.2

**Table S1** physical properties of g-CN and g-CN/MoS<sub>2</sub>-0.2

| Sample                     | $S_{\text{BET}}$ (m <sup>2</sup> g <sup>-1</sup> ) | Center pore size (nm) | Pore Volume (cm <sup>3</sup> g <sup>-1</sup> ) |
|----------------------------|----------------------------------------------------|-----------------------|------------------------------------------------|
| g-CN                       | 13.75                                              | 3.85                  | 0.160                                          |
| g-CN/MoS <sub>2</sub> -0.2 | 29.01                                              | 3.84                  | 0.341                                          |

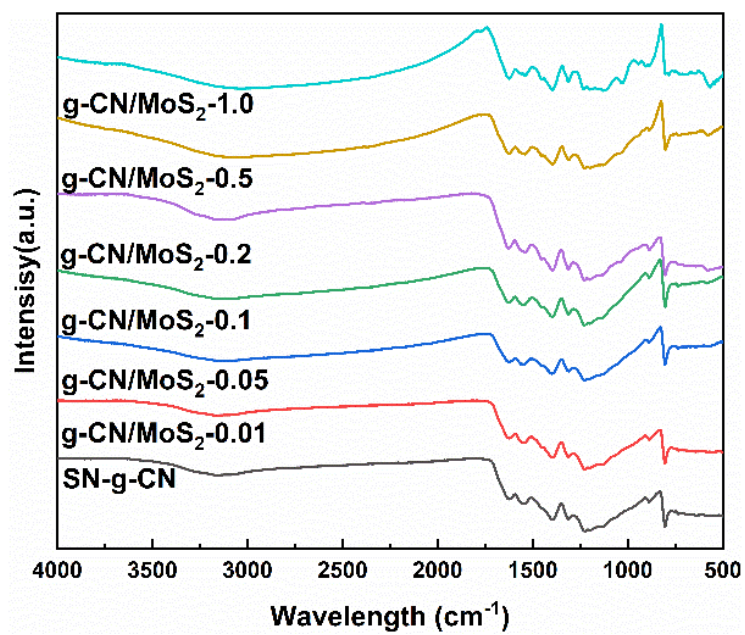

**Figure S3** FT-IR spectrum of the prepared samples

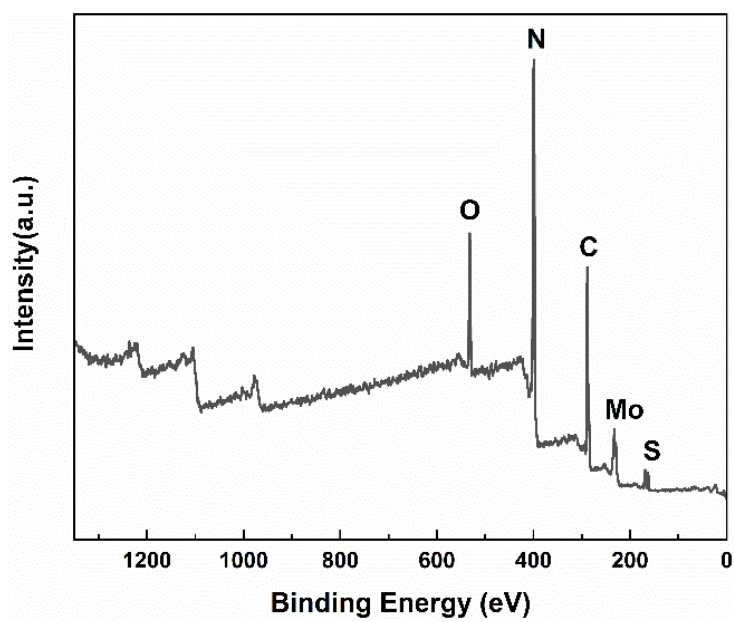

**Figure S4** the survey XPS spectra of g-CN/MoS<sub>2</sub>

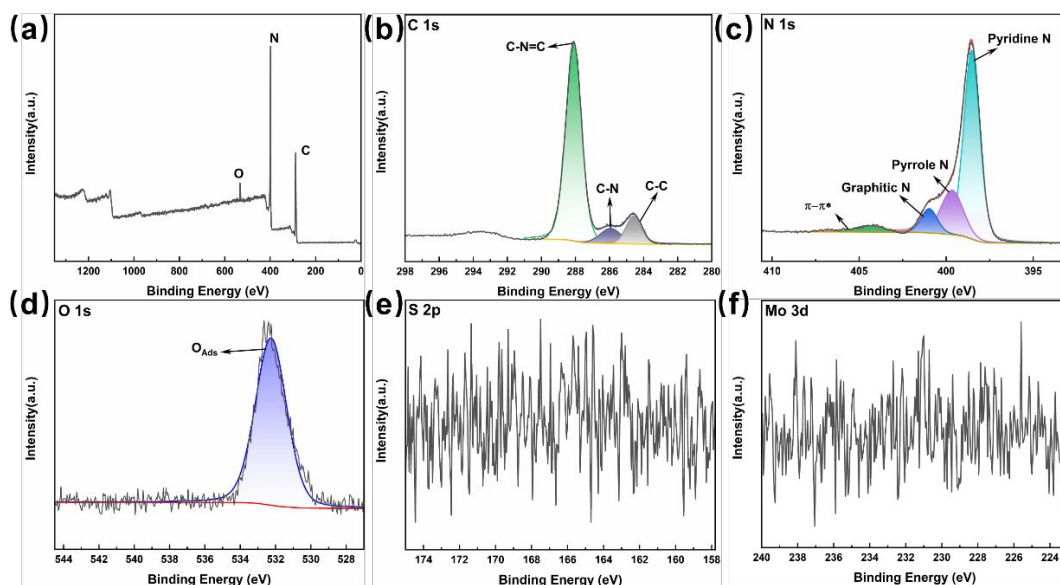

**Figure S5.** XPS spectra of g-CN. (a) Survey XPS spectra (b-f) High resolution spectra of C 1s, N 1s, O 1s, S 2p and Mo 3d.

## Control Experiment

In order to investigate the synthesis mechanism, a control experiment was designed, and the calcination illustration was shown as **Scheme S1**. To be specific, thiourea and  $\text{MoO}_3$  nanorod were placed upstream and downstream of the carrier gas flow, respectively, and the two crucibles were placed without directly contact. The calcination condition was consistent with the synthesis method in manuscript, and the sample downstream was denoted as  $\text{MoS}_2\text{-S1}$ .

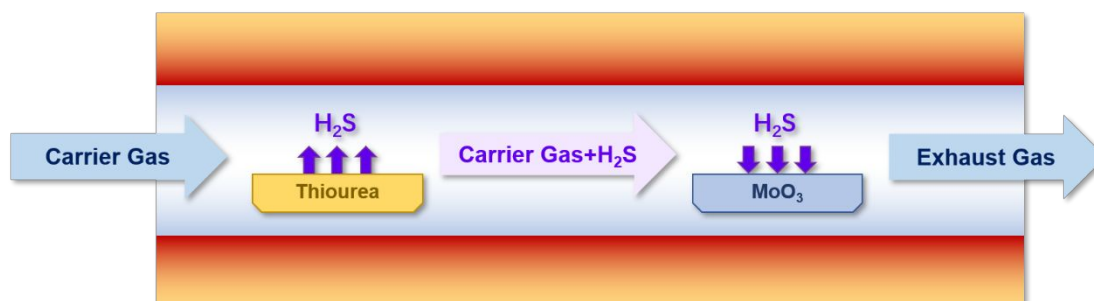

**Scheme S1.** Schematic illustration of the confirmatory experiment

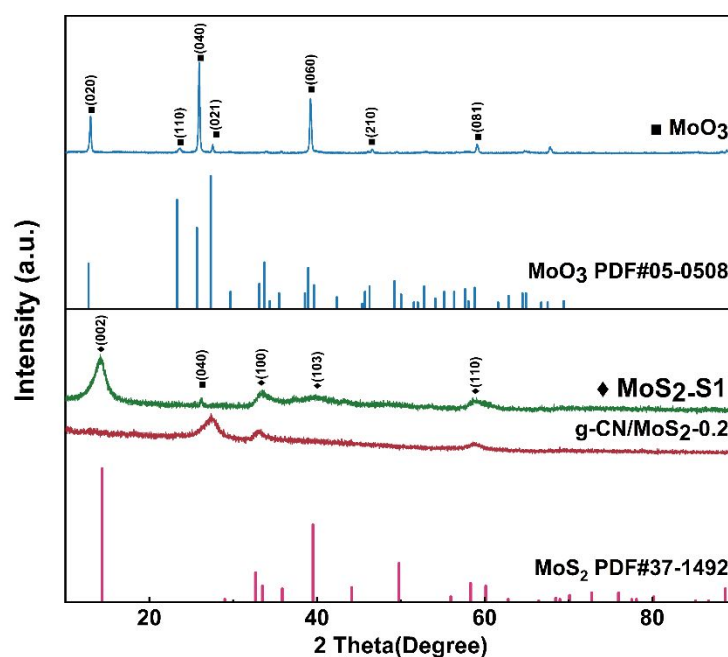

**Figure S6** the XRD pattern of  $\text{MoS}_2\text{-S1}$ ,  $\text{MoO}_3$  and  $\text{g-CN/MoS}_2\text{-0.2}$

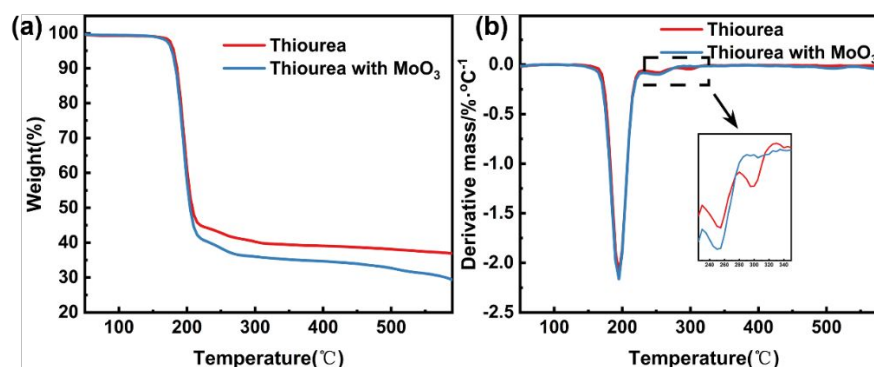

**Figure S7** Thermogravimetric test of the precursor. (a) TG (b) DTA

**The synthesis of g-CN/MoO<sub>3</sub> for control experiment:** 10 g of melamine was fully mixed with the dispersion of 0.2 g MoO<sub>3</sub> and was dried over night at 60°C. The mixture was completely grinded and calcinated at 550°C for 90 min with a heat rate of 5°C·min<sup>-1</sup>. The sample was collected, fully washed by deionized water and alcohol and denoted as g-CN/MoO<sub>3</sub>-0.2

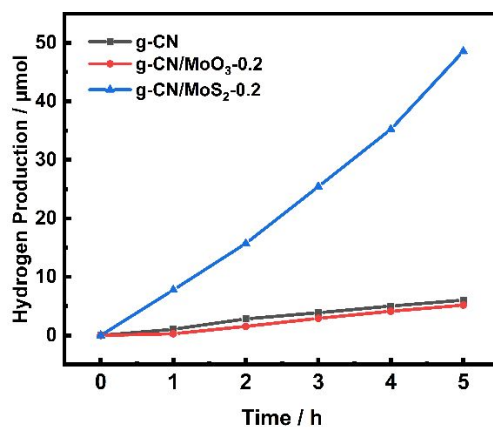

**Figure S8** The comparison spectra of photocatalytic hydrogen evolution between g-CN, g-CN/MoO<sub>3</sub>-0.2 and g-CN/MoS<sub>2</sub>-0.2

**Table S2** the amount of loading MoS<sub>2</sub> measured by ICP

| Sample                      | Amount of MoS <sub>2</sub> (wt%) |
|-----------------------------|----------------------------------|
| g-CN                        | 0                                |
| g-CN/MoS <sub>2</sub> -0.01 | 0.10                             |
| g-CN/MoS <sub>2</sub> -0.05 | 1.13                             |
| g-CN/MoS <sub>2</sub> -0.1  | 2.56                             |
| g-CN/MoS <sub>2</sub> -0.2  | 8.54                             |
| g-CN/MoS <sub>2</sub> -0.5  | 27.92                            |
| g-CN/MoS <sub>2</sub> -1.0  | 96.56                            |

**Table S3** Comparison of photocatalytic hydrogen evolution efficiency by composite of MoS<sub>2</sub> and graphitic carbon nitride

| Photocatalyst                                                   | Synthesis method                  |                             |                               | Increase<br>d<br>multiple* | Ref.         |
|-----------------------------------------------------------------|-----------------------------------|-----------------------------|-------------------------------|----------------------------|--------------|
|                                                                 | g-CN                              | MoS <sub>2</sub>            | composite                     |                            |              |
| <b>0D(MoS<sub>2</sub>)/2D(g-C<sub>3</sub>N<sub>4</sub>)</b>     | Calcination                       | Hydrothermal method         | Sonicated & thermal treatment | 8.1 times                  | <sup>1</sup> |
| <b>crystalline MoS<sub>2</sub>/g-C<sub>3</sub>N<sub>4</sub></b> | Calcination-hydrothermal method   | Hydrothermal method         | Sonicated treatment           | 16.8 times                 | <sup>2</sup> |
| <b>2D-2D MoS<sub>2</sub>/g-C<sub>3</sub>N<sub>4</sub></b>       | Calcination & sonicated treatment | Solvent-thermal method      | Thermal treatment             | 15.8 times                 | <sup>3</sup> |
| <b>MoS<sub>2</sub>-g-C<sub>3</sub>N<sub>4</sub></b>             | Calcination                       | Hydrothermal method         | Thermal treatment             | 11.3 times                 | <sup>4</sup> |
| <b>3D porous MoS<sub>2</sub>/g-C<sub>3</sub>N<sub>4</sub></b>   | Calcination                       | Freeze drying & calcination | In situ Thermal treatment     | 6.14 times                 | <sup>5</sup> |
| <b>MoS<sub>2</sub>/CO-C<sub>3</sub>N<sub>4</sub></b>            | Calcination in CO <sub>2</sub>    | Hydrothermal method         | Ultrasonic treatment          | 1.85 times                 | <sup>6</sup> |
| <b>Nanoflower MoS<sub>2</sub>/g-C<sub>3</sub>N<sub>4</sub></b>  | Calcination                       | Hydrothermal method         | Ultrasonic treatment          | 5 times                    | <sup>7</sup> |
| <b>Rod-like g-CN/MoS<sub>2</sub></b>                            | Calcination                       | Gas-solid reaction          | In situ sulfurization         | 13.4 times                 | This work    |

\*Obtained by comparing the photocatalytic hydrogen evolution rate of modified

## References

1. Liu, Y.; Zhang, H.; Ke, J.; Zhang, J.; Tian, W.; Xu, X.; Duan, X.; Sun, H.; O Tade, M.; Wang, S., 0D (MoS<sub>2</sub>)/2D (g-C<sub>3</sub>N<sub>4</sub>) heterojunctions in Z-scheme for enhanced photocatalytic and



- electrochemical hydrogen evolution. *Applied Catalysis B: Environmental* **2018**, 228, 64-74.
2. Yu, H.; Xiao, P.; Wang, P.; Yu, J., Amorphous molybdenum sulfide as highly efficient electron-cocatalyst for enhanced photocatalytic H<sub>2</sub> evolution. *Applied Catalysis B: Environmental* **2016**, 193, 217-225.
  3. Yuan, Y.-J.; Shen, Z.; Wu, S.; Su, Y.; Pei, L.; Ji, Z.; Ding, M.; Bai, W.; Chen, Y.; Yu, Z.-T.; Zou, Z., Liquid exfoliation of g-C<sub>3</sub>N<sub>4</sub> nanosheets to construct 2D-2D MoS<sub>2</sub>/g-C<sub>3</sub>N<sub>4</sub> photocatalyst for enhanced photocatalytic H<sub>2</sub> production activity. *Applied Catalysis B: Environmental* **2019**, 246, 120-128.
  4. Ge, L.; Han, C.; Xiao, X.; Guo, L., Synthesis and characterization of composite visible light active photocatalysts MoS<sub>2</sub>-g-C<sub>3</sub>N<sub>4</sub> with enhanced hydrogen evolution activity. *International Journal of Hydrogen Energy* **2013**, 38 (17), 6960-6969.
  5. Cao, Y.; Gao, Q.; Li, Q.; Jing, X.; Wang, S.; Wang, W., Synthesis of 3D porous MoS<sub>2</sub>/g-C<sub>3</sub>N<sub>4</sub> heterojunction as a high efficiency photocatalyst for boosting H<sub>2</sub> evolution activity. *RSC Advances* **2017**, 7 (65), 40727-40733.
  6. Kong, L.; Yan, J.; Liu, S. F., Carbonyl Linked Carbon Nitride Loading Few Layered MoS<sub>2</sub> for Boosting Photocatalytic Hydrogen Generation. *ACS Sustainable Chemistry & Engineering* **2019**, 7 (1), 1389-1398.
  7. Yazi, L.; Xinyuan, X.; Jinqiang, Z.; Huayang, Z.; Wenjie, T.; Xiaojie, L.; Moses, O. T.; Hongqi, S.; Shaobin, W., Flower-like MoS<sub>2</sub> on graphitic carbon nitride for enhanced photocatalytic and electrochemical hydrogen evolutions. *Applied Catalysis B: Environmental* **2018**, 239, 334-344.
